# Supplementary material for: A structural variant in the 5’-flanking region of the TWIST2 gene affects melanocyte development in belted cattle
Source: PubMed Central journal article supplement (PMC5489250; doi:10.1371/journal.pone.0180170), 2017-06-28

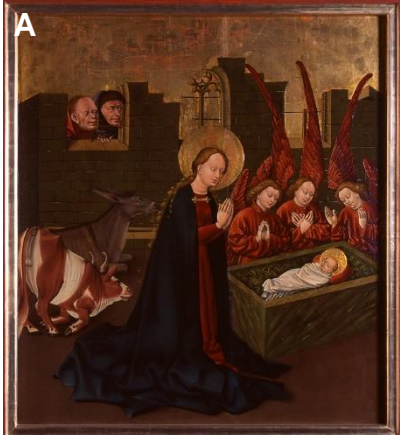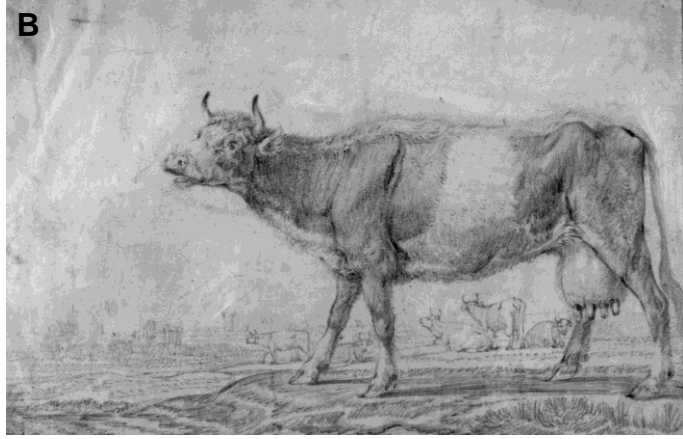

Supplement: pone.0180170.s001.pdf [file pone.0180170.s001.pdf]
